# Supplementary material for: Macaronesia as a Fruitful Arena for Ecology, Evolution, and Conservation Biology
Source: Frontiers journal article supplement (doi:10.3389/fevo.2021.718169), 2021-11-05
Supplement: Data_Sheet_1.xlsx [file Data_Sheet_1.xlsx]

## Sheet: Title and authors
Title: Macaronesia as a fruitful arena for Ecology, Evolution and Conservation Biology
Short title: Macaronesia as a research hotspot
Margarita Florencio, Jairo Patiño, Sandra Nogué, Anna Traveset, Paulo A. V. Borges, Hanno Schaefer, Isabel R. Amorim, Miquel Arnedo, Sérgio P. Ávila, Pedro Cardoso, Lea de Nascimento, José María Fernández-Palacios, Sofia I. Gabriel, Artur Gil, Vítor Gonçalves, Ricardo Haroun, Juan Carlos Illera, Marta López-Darias, Alejandro Martínez, Gustavo M. Martins, Ana I. Neto, Manuel Nogales, Pedro Oromí, …

## Sheet: Legend
ESM1: Number of endemic and native (non-endemic native plus endemic) species occurring at each Macaronesian archipelago (Azores, Madeira, Selvagens, Canary Islands and Cabo Verde), and the proportion of the endemic species, at the terrestrial (“Terrestrial” spreadsheet) and marine (“Marine” spreadsheet) realms. We provide a range of possible values of endemicity for the terrestrial Azorean Mollus…

## Sheet: Terrestrial
Terrestrial group Number of natives (non-endemic native plus endemic) species	AZORES	MADEIRA	SELVAGENS	CANARY ISLANDS	CABO VERDE
Fungi	581	734	3	3943	49
Lichens s.l. (lichens and lichenicolous fungi)	786	750	25	1164	258
Bacillariophyta and Amoebozoa (diatoms and amoebae)	539	No data	No data	1	No data
Bryophyta (mosses, liverworts, hornworts)	471	511	9	520	154
Tracheophyta (Spermatophyta, ferns & fern allies)	270	1337	86	1362	282
Platyhelminthes (flatworms)	8	7*	7*	45	No data
Nematoda (roundworms)	5	34	No data	81	No data
Annelida	22	36*	36*	49	No data
Mollusca (slugs, snails and bivalves)	54-114	191	2	285	24
Arthropoda	1323	3062	173	7279	1495
Chordata (vertebrates)	30	35	9	97	62
Total	4089	6697	350	14826	2324
Terrestrial group Number of endemic species	AZORES	MADEIRA	SELVAGENS	CANARY ISLANDS	CABO VERDE
Fungi	23	36	0	232	0
Lichens s.l. (lichens and lichenicolous fungi)	8	12	0	69	8
Bacillariophyta and Amoebozoa (diatoms and amoebae)	7	No data	No data	0	No data
Bryophyta (mosses, liverworts, hornworts)	7	11	0	6	6
Tracheophyta (Spermatophyta, ferns & fern allies)	65	124	11	573	68
Platyhelminthes (flatworms)	0	1*	1*	1	No data
Nematoda (roundworms)	2	1	No data	9	No data
Annelida	0	0	0	13	No data
Mollusca (slugs, snails and bivalves)	49	162	1	269	10
Arthropoda	236	887	39	3202	368
Chordata (vertebrates)	3	3	1	24	27
Total	400	1237	53	4398	487
Terrestrial group Percentage of endemic species	AZORES	MADEIRA	SELVAGENS	CANARY ISLANDS	CABO VERDE
Fungi	3.95869	4.90463	0	5.9	0
Lichens s.l. (lichens and lichenicolous fungi)	1.01781	1.60858	0	5.9	3.10078
Bacillariophyta and Amoebozoa (diatoms and amoebae)	1.2987	No data	No data	0	No data
Bryophyta (mosses, liverworts, hornworts)	1.4862	2.15264	0	1.2	3.8961
Tracheophyta (Spermatophyta, ferns & fern allies)	24.0741	9.2745	12.8	42.1	24.1135
Platyhelminthes (flatworms)	0	14.2857	14.3	2.2	No data
Nematoda (roundworms)	40	2.94118	No data	11.1	No data
Annelida	0	0	0	26.5	No data
Mollusca (slugs, snails and bivalves)	90,7-43,0	84.8	50	94.4	41.6667
Arthropoda	17.8382	28.968	22.5	44	24.6154
Chordata (vertebrates)	10	8.57143	11.1	24.7	43.5484
Average	17,3-13,0	15.8	12.5	23.5	20.1

## Sheet: Marine
Marine group - Number of natives (non-endemic native plus endemic) species	AZORES	MADEIRA	SELVAGENS	CANARY ISLANDS	CABO VERDE
Macroalgae (0-50 m)	424	394	294	689	333
Mollusca: Gastropoda (0-50 m)	280	397	207	811	608
Mollusca: Bivalvia (0-100 m)	96	110	37	220	117
Annelida: Polychaeta (0-200 m)	169	300	86	465	213
Pisces (coastal) (0-200 m)	165	208	76	299	303
Crustacea: Brachyura (0- 200 m)	62	75	No data	120	117
Echinodermata (0-200 m)	64	69	18	85	76
Total	1260	1553	718	2689	1767
Marine group Number of endemic species	AZORES	MADEIRA	SELVAGENS	CANARY ISLANDS	CABO VERDE
Macroalgae (0-50 m)	0	1	0	1	0
Mollusca: Gastropoda (0-50 m)	37	14	3	96	268
Mollusca: Bivalvia (0-100 m)	0	0	0	6	9
Annelida: Polychaeta (0-200 m)	1	10	0	10	9
Pisces (coastal) (0-200 m)	1	0	0	2	22
Crustacea: Brachyura (0- 200 m)	0	0	No data	0	10
Echinodermata (0-200 m)	0	0	0	0	1
Total	39	25	3	115	319
Marine group - Percentage of endemic species	AZORES	MADEIRA	SELVAGENS	CANARY ISLANDS	CABO VERDE
Macroalgae (0-50 m)	0	0.253807	0	0.145138	0
Mollusca: Gastropoda (0-50 m)	13.2143	3.52645	1.44928	11.8372	44.0789
Mollusca: Bivalvia (0-100 m)	0	0	0	2.72727	7.69231
Annelida: Polychaeta (0-200 m)	0.591716	3.33333	0	2.15054	4.22535
Pisces (coastal) (0-200 m)	0.606061	0	0	0.668896	7.26073
Crustacea: Brachyura (0- 200 m)	0	0	No data	0	8.54701
Echinodermata (0-200 m)	0	0	0	0	1.31579
Average	2.05887	1.01623	0.241546	2.50415	10.4457
